# Supplementary material
Source: PubMed Central journal article supplement (PMC2908379)

## Supporting Info

**S1.** IC<sub>50</sub> values of **1-11** on HIF-1 activation in T47D and PC-3 cells, and cell proliferation/viability in T47D, MDA-MB-231, PC-3, and DU145 cells.

| Compound  | HIF-1 (T47D)                                  |                                      | HIF-1 (PC-3)                                  | Tumor Cell Proliferation/Viability |                                     |                               |                                |
|-----------|-----------------------------------------------|--------------------------------------|-----------------------------------------------|------------------------------------|-------------------------------------|-------------------------------|--------------------------------|
|           | (1% O <sub>2</sub> )<br>IC <sub>50</sub> (μM) | (1,10-phen)<br>IC <sub>50</sub> (μM) | (1% O <sub>2</sub> )<br>IC <sub>50</sub> (μM) | T47D<br>IC <sub>50</sub> (μM)      | MDA-MB-231<br>IC <sub>50</sub> (μM) | PC-3<br>IC <sub>50</sub> (μM) | DU145<br>IC <sub>50</sub> (μM) |
| <b>1</b>  | 25                                            | >30                                  | >30                                           | >30                                | >30                                 | >30                           | >30                            |
| <b>2</b>  | 20                                            | >30                                  | >30                                           | 22                                 | >30                                 | >30                           | >30                            |
| <b>3</b>  | 20                                            | 20                                   | >30                                           | >30                                | >30                                 | >30                           | >30                            |
| <b>4</b>  | 20                                            | 30                                   | >30                                           | >30                                | >30                                 | >30                           | >30                            |
| <b>5</b>  | 20                                            | >30                                  | >30                                           | >30                                | >30                                 | >30                           | >30                            |
| <b>6</b>  | >30                                           | >30                                  | >30                                           | >30                                | >30                                 | >30                           | >30                            |
| <b>7</b>  | >30                                           | >30                                  | >30                                           | >30                                | >30                                 | >30                           | >30                            |
| <b>8</b>  | 15                                            | 15                                   | 15                                            | >30                                | 23                                  | >30                           | >30                            |
| <b>9</b>  | >30                                           | ND <sup>a</sup>                      | ND <sup>a</sup>                               | >30                                | >30                                 | >30                           | >30                            |
| <b>10</b> | >30                                           | >30                                  | >30                                           | >30                                | >30                                 | >30                           | >30                            |
| <b>11</b> | >30                                           | ND <sup>a</sup>                      | ND <sup>a</sup>                               | >30                                | >30                                 | >30                           | >30                            |

<sup>a</sup>ND: Not determined.

**S2.** New species of *Axinella* (Axinellidae) collected (collection C020287) at a depth of -16 M off the southeastern coast of South Africa on March 22, 2000. Photograph provided by Dr. M.T. Davies-Coleman (Dept. of Chemistry, Rhodes University, Grahamstown, South Africa).

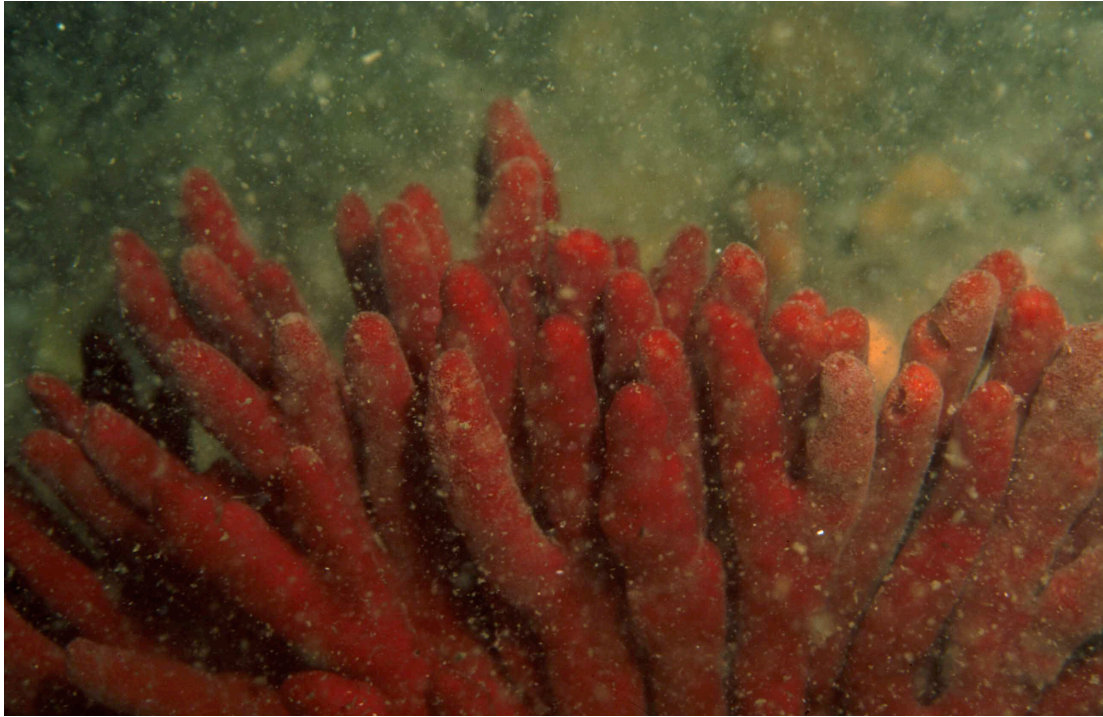

Supplement: NIHMS216835-supplement-1.pdf [file NIHMS216835-supplement-1.pdf]
